# Supplementary material
Source: Frontiers journal article supplement (https://www.frontiersin.org/articles/254032)
Supplement: Table_1.pdf [file Table_1.pdf]

## *Supplementary Material*

### **Distinguishing Relational Aspects of Character Strengths with Subjective and Psychological Well-being**

**Melanie Hausler\*, Cornelia Strecker, Alexandra Huber, Mirjam Brenner, Thomas Höge, Stefan Höfer**

**\* Correspondence:** Melanie Hausler: melanie.hausler@i-med.ac.at

Supplementary Table 1: Character strengths overview<sup>#</sup>

---

#### **(1) Wisdom and knowledge: cognitive strengths that entail the acquisition and use of knowledge**

|                          |                                                                                                                   |
|--------------------------|-------------------------------------------------------------------------------------------------------------------|
| Creativity               | Thinking of novel and productive ways to conceptualize and do things.                                             |
| Curiosity                | Taking an interest in ongoing experience for its own sake; finding things fascinating; exploring and discovering. |
| Open-mindedness/judgment | Thinking things through and examining them from all sides; being able to change one's mind in light of evidence.  |
| Love of learning         | Mastering new skills, topics, and bodies of knowledge.                                                            |
| Perspective              | Being able to provide wise counsel; having ways of looking at the world that makes sense.                         |

#### **(2) Courage: Emotional strengths that involve the exercise of will to accomplish goals in the face opposition, external or internal.**

|                          |                                                                                                                   |
|--------------------------|-------------------------------------------------------------------------------------------------------------------|
| Authenticity/honesty     | Speaking the truth and presenting oneself in a genuine way; taking responsibility for one's feelings and actions. |
| Bravery                  | Not shrinking from threat, challenge, difficulty, or pain; speaking up for what is right; acting on convictions.  |
| Persistence/perseverance | Finishing what one starts and finding pleasure in it.                                                             |
| Zest/enthusiasm          | Approaching life with excitement and energy; feeling alive and activated.                                         |

#### **(3) Humanity: Interpersonal strengths that involve tending and befriending other**

|          |                                                                          |
|----------|--------------------------------------------------------------------------|
| Kindness | Doing favors and good deeds for others; helping and taking care of them. |
|----------|--------------------------------------------------------------------------|

|                     |                                                                                                                  |
|---------------------|------------------------------------------------------------------------------------------------------------------|
| Love                | Valuing close relations with others.                                                                             |
| Social intelligence | Being aware of the motives and feelings of others and oneself; knowing what to do to fit into social situations. |

**(4) Justice: Civic strengths that underlie healthy community life**

|            |                                                                                                                  |
|------------|------------------------------------------------------------------------------------------------------------------|
| Fairness   | Treating all people the same according to notions of fairness and justices.                                      |
| Leadership | Encouraging group activities, seeing that they happen and meanwhile maintaining good relations within the group. |
| Teamwork   | Working well as a group or team member; being loyal.                                                             |

**(5) Temperance: Strengths that protect against excess**

|                  |                                                                                              |
|------------------|----------------------------------------------------------------------------------------------|
| Forgiveness      | Forgiving those who have done wrong; not being vengeful.                                     |
| Modesty/humility | Letting one's accomplishments speak for themselves.                                          |
| Prudence         | Being careful about one's choices; not saying or doing things that might later be regretted. |
| Self-regulation  | Regulating what one feels and does; being disciplined.                                       |

**(6) Transcendence: Strengths that forge connections to the larger universe and provide meaning**

|                                       |                                                                                                                      |
|---------------------------------------|----------------------------------------------------------------------------------------------------------------------|
| Appreciation of beauty and excellence | Noticing and appreciating beauty, excellence or skilled performance in various domains of life.                      |
| Gratitude                             | Being aware of and thankful for the good things that happen.                                                         |
| Hope                                  | Expecting the best in the future and working to achieve it.                                                          |
| Humor                                 | Liking to laugh and tease; bringing smiles to other people.                                                          |
| Spirituality/purpose                  | Having coherent beliefs about the higher purpose and meaning of the universe that shape conduct and provide comfort. |

---

<sup>#</sup> adapted from: <http://www.viacharacter.org/www/Character-Strengths/VIA-Classification> and from: Peterson, C., & Seligman, M. E. P. (2004). Character strengths and virtues: A handbook and classification. New York: Oxford University Press and Washington, DC: American Psychological Association. [www.viacharacter.org](http://www.viacharacter.org)
